# Looking at my own Face: Visual Processing Strategies in Physical Self-representation

Anya Chakraborty<sup>1</sup> & Bhisudev Chakrabarti<sup>1\*</sup>

<sup>1</sup>*Centre for Integrative Neuroscience and Neurodynamics, School of Psychology and Clinical Language Sciences, University of Reading, Reading, United Kingdom. Correspondence and requests for materials should be addressed to B.C. (email: [b.chakrabarti@reading.ac.uk](mailto:b.chakrabarti@reading.ac.uk))*

**Keywords: Physical self-representation, Self-face, Autism Spectrum Disorder, Visual processing, Eye-tracking, Psychophysics**

## Abstract

We live in an age of ‘selfies’. Yet, how we look at our own faces has seldom been systematically investigated. In this study we test if visual processing of self-face is different from other faces, using psychophysics and eye-tracking. This paradigm also enabled us to test the association between the psychophysical properties of self-face representation and visual processing strategies involved in self-face recognition. Thirty-three adults performed a self-face recognition task from a series of self-other face morphs with simultaneous eye-tracking. Participants were found to look at lower part of the face for longer duration for self-face compared to other-face. Participants with a more distinct self-face representation, as indexed by a steeper slope of the psychometric response curve for self-face recognition, was found to look longer at upper part of the faces identified as ‘self’ in relation to those identified as ‘other’. We also investigated the association of autism-related traits with self-face processing metrics since autism has previously been associated with atypical self-processing, particularly in the psychological domain. This study tested physical aspects of self-processing and did not find any self-face specific association with autistic traits, suggesting that autism-related features may be related to self-processing in a domain specific manner.

## Introduction

Self-awareness is one of the most complex manifestations of human cognition and argued to be a prerequisite for understanding mental states of ‘self’ and ‘others’ (Gallup, 1970, Keenan et al., 1999). Self-awareness exists in different domains, e.g. in the physical domain as the awareness of one’s own body and face, in the psychological domain as an entity with specific traits and qualities, and in the temporal domain as a continuous being across time (James, 1890). Physical self-awareness is one of the earliest and most basic domains of self-awareness to develop. Among other methods, self-face recognition has been often used as a paradigm to interrogate this domain of self-processing (Uddin et al., 2005, Sui et al., 2006, Sugiura et al., 2000, Platek et al., 2008, Pannese and Hirsch, 2011, Nielsen and Dissanayake, 2004, Amsterdam, 1972, Brédart et al., 2006, Devue et al., 2009, Keenan et al., 2003, Keenan et al., 2000, Kircher et al., 2001) and most studies on physical self-representation have focussed on the investigation of the behavioural and neural basis of self-face recognition (Keenan et al., 1999, Tong and Nakayama, 1999, Ma and Han, 2010, Platek et al., 2008, Kircher et al., 2002, Uddin et al., 2005). Comparatively little is known (Hung and

Hunt, 2012, Kita et al., 2010) about gaze behaviour during the recognition of a face as belonging to oneself, leading to the question of whether the gaze response pattern for a face recognized as ‘self’ is different from one recognized as ‘other’. Are self-faces special or merely familiar faces, as would be argued by some theoretical accounts (Gillihan and Farah, 2005)? The study of eye gaze behaviour in self-face recognition allows for better understanding of visual strategies underpinning this fundamental aspect of physical self-awareness. In an age of selfies, how we look at our own face assumes an importance beyond the academic domain.

Looking at self-face is associated with greater attention to and faster recall compared to other faces (Devue et al., 2009, Tong and Nakayama, 1999). Identification of self-face requires orientation towards the self from a decentralized position and indicates high salience for self-related stimuli (Heinisch et al., 2011). The self-face is identified faster among other faces even where faces are presented in non-upright conditions (Tong and Nakayama, 1999) (though see Devue et al. (Devue et al., 2009)). Such high salience for self-related stimuli is also evident from their facilitatory effect on spatial priming (Pannese and Hirsch, 2011), interference with cognitive tasks (Brédart et al., 2006), as well as from EEG experiments showing an increased P300 signal (related to attention allocation) to self-name (Gray et al., 2004). Self-specific stimuli have been found to alter the salience of neutral stimuli by association leading to the proposal of the Self-Attention Network (SAN) (Sui and Humphreys, 2013, Porciello et al., 2016). SAN constitute a model where neural networks involved in self-processing interact with attentional networks to determine self-salient behaviour. Notably, this individual-specific salience for the self-face is distinct from the salience associated with low-level visual features of the presented stimulus.

Different gaze allocation strategies are employed to discriminate between familiar and unfamiliar faces. Notably, these strategies are task-dependent, e.g. when viewing unfamiliar faces in a recall task, participants showed greater sampling from all regions of the face while greater gaze fixation to the eye region was noted for more familiar faces (Heisz and Shore, 2008). In contrast, participants showed increased sampling and exploration of facial features for familiar faces compared to unfamiliar faces during a recognition task (Van Belle et al., 2010). In order to investigate if self-faces are visually processed similar to familiar faces, the current study uses a self-other face recognition task to investigate gaze response pattern for faces identified as belonging to self compared to those identified as ‘other’. It is predicted that if self-faces are processed similarly to other familiar faces then viewing the self-face should be associated with increased sampling and exploration of facial features of the self-face.

Self-face representation has behaviourally been studied using psychophysics paradigms that utilise morphed stimuli and calculate a psychometric response function based on the participant’s identification of the morphs as ‘self’ or ‘other’ (Chakraborty and Chakrabarti, 2015). However, such paradigms tend not to include simultaneous eye-tracking measures; it is thus not possible to elucidate if the pattern of gaze fixation to self and other faces can predict the mental representation of the self-face. Using a morphing paradigm, an eye-tracking study reported a stronger gaze cueing effect for self-similar compared to self-dissimilar faces (Hung and Hunt, 2012). However, visual processing strategies of self and unfamiliar faces in previous studies have not been mapped onto the psychometric properties of self-other face representation. The current study addresses this gap in knowledge by using a self-other face morphing paradigm to investigate self-face representation with simultaneous eye-tracking.

A secondary aim of the current study tested individual differences in self-face processing in relation to autism-related traits. Atypical gaze fixation to social stimuli (Dalton et al., 2005, Pelphrey et al., 2002, Klin et al., 2002) as well as atypical self-processing (Lombardo et al., 2007, Lombardo et al., 2009, Lombardo et al., 2010, Uddin et al., 2008) is well documented in individuals with Autism Spectrum Disorders (ASD). Accordingly, the current study aimed to test if there was any association between autistic traits and gaze duration to faces in general and if any such association is specific to facial identity (self or other) and/or facial region (upper vs. lower parts of the face).

In view of the evidence discussed above for different gaze fixation patterns for familiar and unfamiliar faces, the first question of interest is whether gaze duration for upper parts of the face (including eye region) and for lower parts of the face (including mouth) differs between faces identified as the self vs. those identified as other? Following the reports of visual processing of familiar faces, it is predicted that gaze duration to the lower parts of the face will be longer for a face identified as 'self' compared to 'other'. The second aim is to investigate the relationship between self-face representation at the behavioural level (operationalised by the slope of the psychometric function) with gaze metrics for faces identified as 'self' versus 'other'. It is predicted that the slope of the self – recognition response curve will be positively associated with the proportion of gaze duration to upper parts of the morphed faces identified as 'self' in comparison to faces identified as other. Since eyes provide the richest source of information for identification of a face (Emery, 2000, Henderson et al., 2005, Itier et al., 2007, Janik et al., 1978, Laughery et al., 1971, Luria and Strauss, 2013, Schyns et al., 2002), it is predicted that individuals who spend more time extracting information from the eyes for faces identified as 'self' will have a more distinct self-face representation as evidenced by a steeper self-recognition response slope. They are expected to perform less facial feature sampling of the mouth or other surrounding regions. This processing strategy is not predicted for the unfamiliar other face as there is no previous exposure to the unfamiliar face that will direct such gaze behaviour.

The third aim is to investigate the association between autistic traits and gaze duration to upper and lower parts of self and other faces. It is predicted that autistic traits will correlate negatively with gaze duration to the upper portion of the face. This negative association between autistic traits and gaze duration to eye-region is predicted to be stronger for faces identified as 'other' compared to those identified as 'self'. One of the theoretical explanations of reduced gaze to the eye region in ASD is argued to be a negative and stressful reaction to eye-contact in individuals with ASD (Hutt and Ounsted, 1966, Kliemann et al., 2010), a reaction that may not hold true for self-faces.

Alternatively, the social motivation theory of ASD posits that reduced fixation to eye region is driven by reduced reward values associated with social stimuli in ASD (Chevallier et al., 2012) with an increased preference for geometrical images compared with social images observed in children with ASD (Pierce et al., 2016, Pierce et al., 2011). If this theory holds true it can be expected that the association between higher autistic traits with reduced gaze to eye regions to be less severe for faces identified as 'self'. This is predicted because self-face can be argued to be of higher reward value (Devue et al., 2009).

## **Methods**

### **Participant Details**

Thirty-three healthy adults (5 males; mean  $\pm$  SD age = 20.67  $\pm$  3.69 years) without any reported neurological or psychiatric disorders were recruited from the University of Reading

campus and received either a small compensation or credit points for their participation. All participants were right-handed and had normal or corrected to normal vision. Ethical approval for the study was obtained from the Department of Psychology Research Ethics Committee of the University of Reading and all methods were carried out in accordance with these guidelines regarding all relevant aspects, such as recruitment, compensation and debriefing of participants, as well as the nature of the experiments and other collected information. All participants provided written informed consent in accordance with the Declaration of Helsinki.

## Stimuli

Stimuli were individually tailored for each participant. Each participant was photographed (Canon PowerShot SX700 HS digital camera) looking directly at the camera and holding a neutral expression. Participants were seated at a distance of 100 cm, under constant artificial lighting and with a white background. One unfamiliar ‘other’ identity for each gender and from the same race and age range was also photographed under similar condition.

Following this, each participant’s photograph was converted to grayscale and external features (hairline, jaw line, and ears) were removed. This photograph was then mounted on an oval frame and cropped to a dimension of  $350 \times 500$  pixels using GIMP(2013). A set of stimuli was created for each participant’s face, by morphing self-face with an ‘unfamiliar faces’ using Sqirlz Morph (Xiberpix, Solihull, UK). The following step sizes were used to create the morphing continuum from 100% to 0% of participant’s face (100, 90, 80, 70, 65, 60, 55, 50, 45, 40, 35, 30, 20, 10, 0). Since the previous data showed that individual differences in self-other face category boundary lie within the morph range of 60 and 30 morph percentages for the self-face recognition task(Chakraborty and Chakrabarti, 2015), the morph percentages were at 10% step sizes between 100 and 70 and 30 and 0 and 5% step sizes between 70 and 30.

## Apparatus

Calibration and task presentation was controlled using E-prime 2.2 (Psychology Software Tools, PA, USA) presented with TobiiStudio on a Tobii T60 eye tracker monitor (operating at 60Hz) and resolution of  $1024 \times 768$  pixels. Participants sat in a chair 50 cm from the monitor. They used a keyboard for their responses to the task.

## Eye-tracking Measurements

Before commencing the task, participants underwent a five-point calibration procedure implemented on Tobii Studio. Two regions of interest were pre-positioned over each morphed face for each individual participant. The region of interest 1 (*UPPER ROI*) covered the upper portion of the face including the eyes. The region of interest 2 (*LOWER ROI*) covered the lower portion of the face including the mouth. Gaze within these regions was recorded during this task (see Fig. 1). All ROIs were of the same size.

Next, participants completed a self-face recognition task. Each trial started with fixation cross followed by the stimulus image and then a blank screen (see Fig. 1). Participants were instructed to judge and identify a presented face as either ‘self’ or ‘other’. There were two runs, one for a right handed and the other for a left-handed ‘self’ recognition response. Participants were asked to respond with the right or left hand in a given run. Each run consisted of 15 distinct morphs presented ten times each, resulting in 150 trials per run. Any

keyboard response in the 1500 ms window was recorded. All participants completed the AQ questionnaire online following the completion of the task.

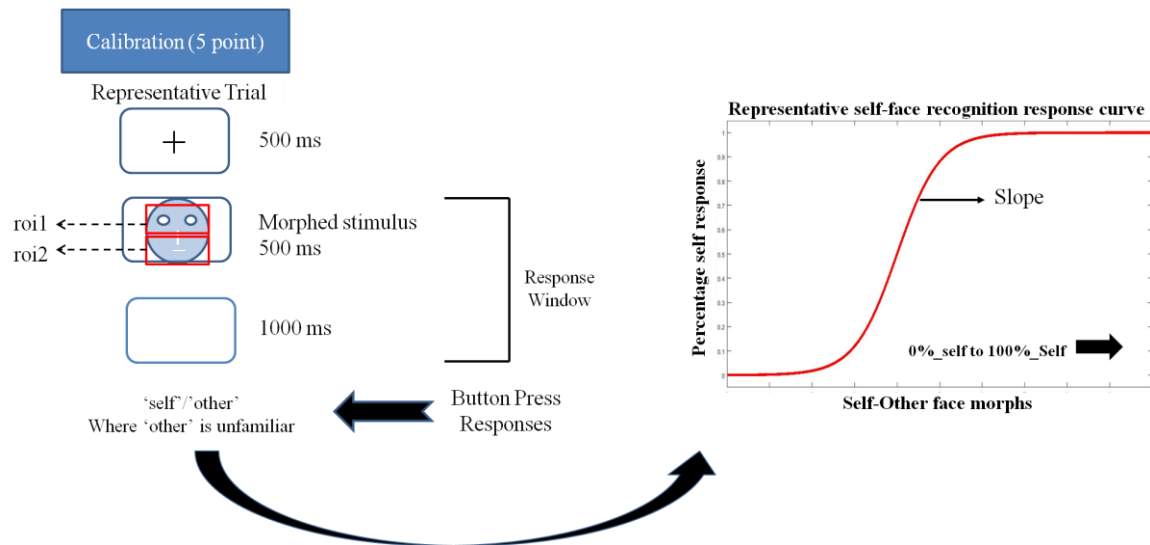

**Fig. 1** Schematic representation of a trial in the eye tracking task. Participant's eye movements and gaze pattern were recorded during the 500ms stimulus presentation window and the behavioural response was recorded in the 500 +1000ms window. Participants pressed the 'a' key for identifying a face as 'self' and 'l' key for identifying a face as 'other' in the self left-hand response. These key responses were reversed for the self-right hand response. The schema also shows a representative self-face recognition response curve calculated from the 'self'/other' face recognition data.

### Data Analysis

Statistical tests were conducted and plots generated using SPSS 21 (IBM SPSS Statistics version 21) and R using ggplot2 package (Wickham, 2009).

Slope calculation for self-other recognition: 'Self' and 'other' responses for both runs were combined for each morph level to generate percentage response curves for self-face recognition response for each participant. The slope of self-recognition for each participant was calculated using a logistic psychometric function fitted for maximum likelihood estimation for Weibull distribution. Depending on the stimulus-related information change across the different morph levels required by an individual participant to shift from the self to other category, the psychometric function gives a steep or shallow slope (see Fig. 1). The steepness of this slope is interpreted as an extent of overlap between the self-face and other face representation. A steeper slope indicates a reduced overlap between the self and other representation. In other words, a steeper slope represents a more distinct self-representation.

AQ score for each participant was calculated using the formula as suggested by the authors (Baron-Cohen et al., 2001).

*Gaze duration analysis:* Gaze position as well as the regions of interest where gaze was on was recorded using E-prime for each time stamp. Gaze position was determined by averaging

the locations of both eyes. In the absence of one eye position during the time stamp, the eye position for the single recorded eye was used. The data were processed using MATLAB. The following criteria were used to identify fixations to be included in the analysis:

- 1) Three successive time stamps within 35 pixels of the original time stamp. Each time stamp is approximately 16.6ms long, hence for a fixation to be included the eye position needed to be within the region of interest for a minimum of 50ms.
- 2) If gaze was outside the range for one time stamp (possibly due to blinking) or was not recorded but the following time stamp was inside the range, the fixation was considered legitimate.

Following the gaze position analysis, the average gaze duration to **UPPER ROI** was calculated for each participant for all trials that the participant identified as ‘self-face’ (*Average\_upper\_duration\_self*) and ‘other-face’ (*Average\_upper\_duration\_other*). Similarly, the average gaze duration to **LOWER ROI** was calculated for each participant for all trial identified as ‘self-face’ (*Average\_lower\_duration\_self*) and ‘other-face’ (*Average\_lower\_duration\_other*).

Next, the proportion of gaze duration to **UPPER ROI** (*Upper\_proportion\_self*) was calculated for each participant for all trials identified as ‘self-face’ by dividing *Average\_upper\_duration\_self* by the sum of *Average\_upper\_duration\_self* and *Average\_lower\_duration\_self*. A similar calculation was done for faces identified as ‘other’. The denominators in both instances were chosen to control for individual differences in total looking time to the different ROIs.

## Data Analysis

*Normality checks and exclusions.* The distribution of all variables was tested before analysis, using Shapiro-Wilkinson’s test of normality. Parametric and non-parametric tests of statistical inference were used accordingly (See Table 1). Influence measures (Cook’s D and leverage) were calculated for each correlation and data points exceeding a cut-off of  $4/N$  were excluded from correlation analysis. Due to the strong directionality of the predictions, 1-tailed statistics are used except for the exploratory analysis between AQ and gaze behaviour.

*Main effects analysis.* To investigate the difference in gaze duration to the upper parts of the face, for faces identified as ‘self’ and ‘other’ a related sample Wilcoxon signed-rank test was computed between *Upper\_proportion\_self* and *Upper\_proportion\_other*.

*Individual differences analysis.* To investigate individual differences in the association between the slope of the self-recognition curve and gaze duration, Kendall rank correlations were computed between the slope of the self-face recognition response curve and a) the *Upper\_proportion\_self* and b) *Upper\_proportion\_other*. To investigate individual differences in the association between AQ scores and eye gaze duration, Kendall rank correlations were computed between AQ and a) *Upper\_proportion\_self* and b) *Upper\_proportion\_other*.

## Results

**Table 1.** Mean and SD for the computed variables. As shown above, multiple variables violated the assumption of normality. Statistical tests were chosen accordingly. In line with directional nature of the hypothesis, all tests were one-tailed unless specified otherwise.

| Variables                         | Mean (SD)    | Shapiro-Wilk Statistics |
|-----------------------------------|--------------|-------------------------|
| Upper_proportion_self             | 0.84(0.19)   | $W = .790, p < .001^*$  |
| Upper_proportion_other            | 0.86(0.178)  | $W = .75, p < .001^*$   |
| Slope of self-face recognition    | 14.9(7.2)    | $W = .89, p = .002^*$   |
| Average_upper_duration_self (ms)  | 282.47(93.3) | $W = .960, p = .3$      |
| Average_upper_duration_other (ms) | 286.88(91.2) | $W = .936, p = .05$     |
| Average_lower_duration_self (ms)  | 47.88(52.8)  | $W = .823, p < .001^*$  |
| Average_lower_duration_other (ms) | 40.28(43.3)  | $W = .83, p < .001^*$   |
| AQ                                | 16.4 (6.34)  | $W = .83, p = .83$      |

### Main effects

There was a significantly greater proportion of gaze duration to *UPPER ROI* for morphed faces identified as ‘other’ compared to morphed faces identified as ‘self’ (Wilcoxon Signed-Rank test for Upper\_proportion\_self & Upper\_proportion\_other:  $Z = -2.385$ , Asymp.Sig = .02, effect size  $r = .42$ ). This conversely illustrated that greater proportion of gaze duration to *LOWER ROI* for morphed faces identified as ‘self’ compared to morphed faces identified as ‘other’.

To investigate if individuals who have a more distinct self-face representation would gaze longer at the upper parts of faces identified as ‘self’ in proportion to faces identified as ‘other’, the ratio of gaze duration for Upper\_proportion\_self to Upper\_proportion\_other was chosen as the dependent variable. This ratio was chosen as it provides, for each participant, a quantified response of whether the looking time to the upper parts of faces is higher for faces identified as self vs. those identified as ‘other’. In line with the prediction, a significant positive correlation was observed between the slope of self-face recognition with the ratio of Upper\_proportion\_self to Upper\_proportion\_other (Kendall’s tau:  $\tau(29) = .23, p = .04$ ; see Fig. 2).

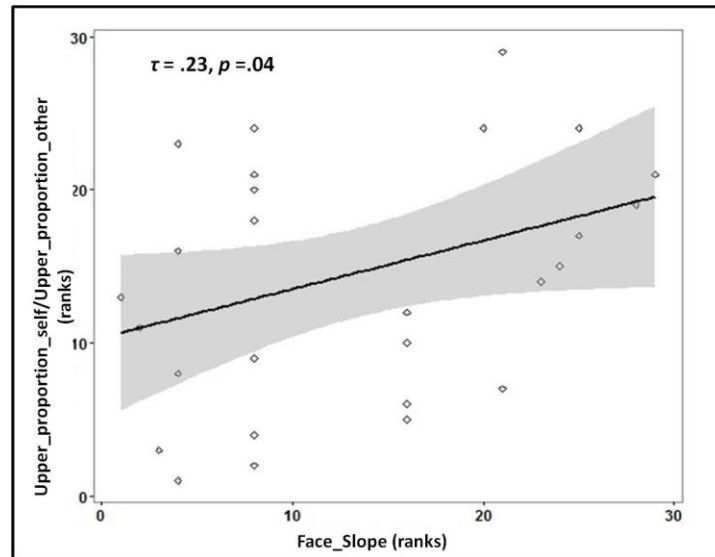

**Fig. 2** Rank scatterplot representing the positive association between the slope for self-face recognition (x-axis) with the proportion of gaze duration (y-axis) to *UPPER ROI* (ratio\_proportion (self:other)) for faces identified as ‘self’ compared to faces identified as ‘other’. The shaded portion represents the 95% confidence region of the slope of the regression line.

### Individual differences

No significant association between autistic traits and proportion of eye gaze duration to *UPPER ROI* for faces identified as ‘self’ (Upper\_proportion\_self; Kendall’s tau:  $\tau(33) = -.008, p = .48$ ) or ‘other’ (Upper\_proportion\_other; Kendall’s tau:  $\tau(33) = .02, p = .45$ ).

Following previous findings of reduced overall looking time to social stimuli (like faces) in individuals with ASD, an exploratory analysis was carried out to investigate if the overall looking time to faces (adding the gaze duration for both regions of interest) was associated with autistic traits. The total gaze duration (for each participant) was calculated for faces identified as ‘self’ and as ‘other’. A significant negative correlation was observed between autistic traits and total looking time for faces identified as ‘self’ (Kendall’s tau:  $\tau(33) = -.305, p = .01$ ) as well as faces identified as ‘other’ (Kendall’s tau:  $\tau(33) = -.286, p = .02$ ; see Fig. 3).

Since the denominators (total looking time) in the ratios (Upper\_proportion\_self & Upper\_proportion\_other) were negatively correlated with autistic traits, this might have influenced the overall relation between the proportion of gaze duration and autistic traits. Hence further correlation analyses were performed between AQ and the average gaze duration for both ROIs and both face categories. A negative association trend was observed between autistic traits and average gaze duration to *UPPER ROI* for faces identified as ‘self’ and for faces identified as ‘other’ (Kendall’s tau:  $\tau(33) = -.197, p = .06$ ). No such trend was observed between autistic traits and average gaze duration to *LOWER ROI* for both faces identified as ‘self’ and faces identified as ‘other’ (Kendall’s tau:  $\tau(33) = -.041, p = .4$ ).

In line with previous results (Chakraborty and Chakrabarti, 2015), no significant association was observed between the self-face recognition slope and autistic traits (Kendall’s tau:  $\tau(33) = -.120, p = .2$ ).



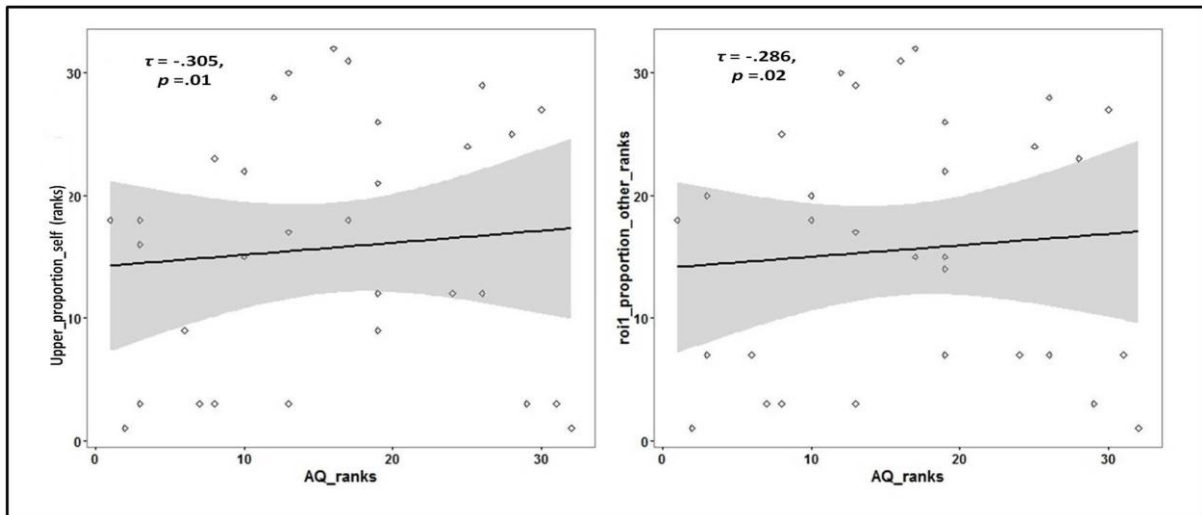

**Fig. 3** Rank scatterplots representing the negative association between the AQ scores with the total gaze duration for faces identified as a) ‘self’ and for faces identified as b) ‘other’. The shaded portion represents the 95% confidence region of the slope of the regression line.

## Discussion

This study tested differences in gaze pattern for faces identified as ‘self’ and ‘other’ from a series of self-other face morphs. The study also investigated the association of these gaze patterns with the behavioural representation of self-faces and autistic traits. In line with the prediction, we found a significant difference in gaze duration to upper vs. lower regions of a face between faces that were identified as ‘self’ and those identified as ‘other’. We also found that individuals with a more distinct self-face representation looked longer at the upper region of faces identified as self vs. those identified as other. Contrary to our predictions, no significant association was observed between autistic traits and the proportion of gaze duration to upper parts of morphed faces for faces identified as ‘self’ or for faces identified as ‘other’. However, a negative association between autistic traits and total gaze duration to both faces identified as ‘self’ and as ‘other’ was noted. The results are discussed in details in the following paragraphs.

### **Faces labelled as ‘self’ are processed more holistically compared to those labelled as ‘other’.**

Self-face has high relational salience (Brédart et al., 2006) to the individual and may possess high reward values (Devue et al., 2009). However, the visual processing strategies employed in recognising the highly salient and familiar self-face is relatively unknown. The current study found that faces identified as ‘self’ had increased gaze duration to lower parts of the face compared to faces identified as ‘other’. However, the gaze duration to the upper region of the face was not significantly different between the two identities. In line with this result, a previous eye tracking study reported increased feature sampling for familiar faces across different regions of the face (Van Belle et al., 2010). The increased facial feature sampling for faces labelled as ‘self’ (and also a report of increased feature sampling of other familiar faces) can be argued as the evidence for self-face (and other highly familiar faces) acting as a salient and rewarding stimuli. Previous work has also found individuals maintain sustained attention to the self-face which can interfere with concomitant task performance (Devue et al., 2009).

## Visual processing of self-face is associated with a more distinct self-face representation.

This study found that the slope of the psychometric function for self-recognition was associated with greater proportion of gaze duration to the upper parts of morphed faces identified as ‘self’ in proportion to those identified as other. The findings show that in individuals with a more distinct self-face representation the gaze duration is proportionately higher for upper parts of the self-face including eye regions compared to those with a less distinct self-face representation (or higher self-other overlap).

The current study did not compare self-face with familiar other faces. Depending on the exposure level, a familiar face may also be of high salience and well represented mentally. Follow-up research should test if distinct behavioural representations of familiar other faces are associated with increased gaze duration to upper parts of these faces. Additionally, it needs to be investigated what possible trait features may lead to individual differences in self-face processing that results in a stronger representation of self-face. For example, do individuals who exhibit a narrower self-face representation exhibit preoccupation with their body image?

## Gaze duration to faces is reduced with higher autistic traits.

Reduced gaze duration to self and other faces was noted in individuals with high autistic traits. This observation replicates several previous reports where individuals with ASD have been shown to demonstrate reduced gaze duration toward faces (Dalton et al., 2005, Pelphrey et al., 2002). Interestingly, no significant difference was seen in this association with autistic traits when self and other faces were compared with one another. This observation suggests that a) individuals are performing at ceiling due to the relative ease of the task, thus masking any potential difference between the processing of self vs. other faces, or b) the differences in gaze processing strategies between self and other faces are orthogonal to the dimension of autistic traits. A previous study investigating self, familiar, and unfamiliar face viewing using eye tracking did not observe any difference in gaze fixation pattern to different categories of faces between control and ASD children (Gillespie-Smith et al., 2014). However, the association was observed between socio-communicative abilities and gaze patterns to self and unfamiliar faces. The current study is consistent with this earlier report.

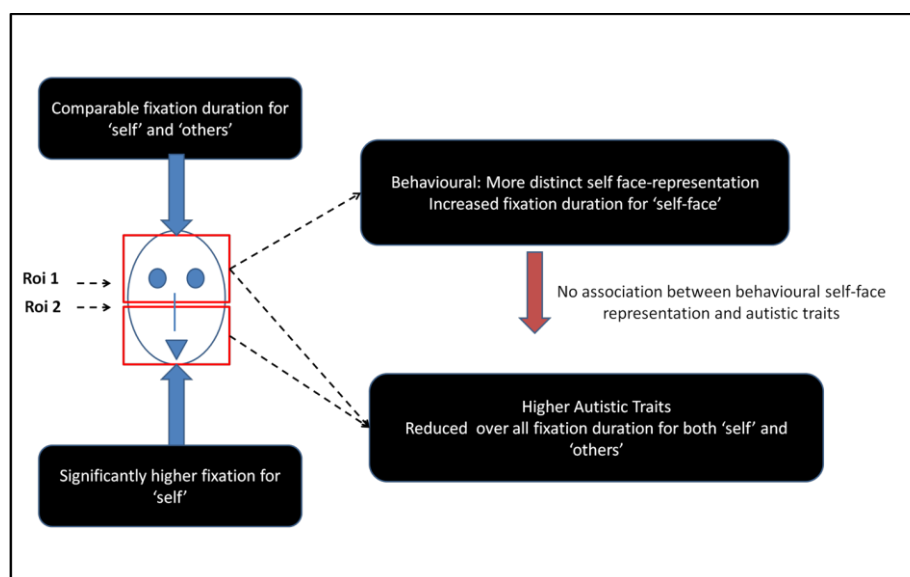

**Fig. 4** Schematic representation of the main findings from the study.

In summary, findings from this study show that the visual processing of self-face is different from faces identified as unfamiliar other and that the mental representation of the self face is related to gaze response to the self-face. This study also shows that higher autistic traits do not influence gaze responses to self-face specifically but reduces looking time to faces (self and other) in general (see Fig. 4 for a summary of results). Future work should investigate if bottom-up visual processing has any self-specific properties by simultaneously testing the visual processing of self and other familiar faces. The results from this study provide initial support that self-face might be processed similarly to other familiar faces and self-specificity may come into play at higher order relay regions in the brain (Kita et al., 2010). Consistent with previous report (Chakraborty and Chakrabarti, 2015) in sub-clinical population, this study found psychometric and gaze scanning properties of physical self-representation, unlike psychological self-representation, appears to be uninfluenced by autistic traits. This finding lends support to the domain specific influence of autistic traits on self-representations (Williams, 2010). However, physical self-representation needs to be tested in clinically diagnosed ASD population using similar approaches to test the generalisability of the current results to the extreme high end of the spectrum of autistic traits.

### **Acknowledgements**

This work was supported by Felix Scholarship Trust. BC was supported by the Medical Research Council UK. The authors wish to thank Anthony T Haffey and Christopher P. Taylor for help with data analysis.

### **Author Contributions**

Both authors developed the study concept. The study design, data collection, analysis, interpretation and draft of manuscript were performed by A.C. under supervision and critical revisions of B.C.

Both authors approved the final version of the manuscript for submission.

### **Additional Information**

Competing financial interests: The authors declare no competing financial interests.

### **References**

*MathWorks - MATLAB and Simulink for Technical Computing* [Online]. Available: <http://www.mathworks.co.uk/>.2013.

*GNU Image Manipulation Program* [Online]. Available: <http://www.gimp.org/>.

AMSTERDAM, B. 1972. Mirror self-image reactions before age two. *Developmental psychobiology*, 5, 297-305.

BARON-COHEN, S., WHEELWRIGHT, S., SKINNER, R., MARTIN, J. & CLUBLEY, E. 2001. The autism-spectrum quotient (AQ): Evidence from asperger syndrome/high-functioning autism, males and females, scientists and mathematicians. *Journal of autism and developmental disorders*, 31, 5-17.

BRÉDART, S., DELCHAMBRE, M. & LAUREYS, S. 2006. Short article one's own face is hard to ignore. *The Quarterly Journal of Experimental Psychology*, 59, 46-52.

CHAKRABORTY, A. & CHAKRABARTI, B. 2015. Is it me? Self-recognition bias across sensory modalities and its relationship to autistic traits. *Molecular autism*, 6, 1.

CHEVALLIER, C., KOHLS, G., TROIANI, V., BRODKIN, E. S. & SCHULTZ, R. T. 2012. The social motivation theory of autism. *Trends in cognitive sciences*, 16, 231-239.

KEENAN, J. P., MCCUTCHEON, B., FREUND, S., GALLUP, G. G., SANDERS, G. & PASCUAL-LEONE, A. 1999. Left hand advantage in a self-face recognition task. *Neuropsychologia*, 37, 1421-1425.

KEENAN, J. P., WHEELER, M. A. & EWERS, M. 2003. The neural correlates of self-awareness and self-recognition. *The self in neuroscience and psychiatry*, 166-179.

KIRCHER, T. T., BRAMMER, M., BULLMORE, E., SIMMONS, A., BARTELS, M. & DAVID, A. S. 2002. The neural correlates of intentional and incidental self processing. *Neuropsychologia*, 40, 683-692.

KIRCHER, T. T., SENIOR, C., PHILLIPS, M. L., RABE-HESKETH, S., BENSON, P. J., BULLMORE, E. T., BRAMMER, M., SIMMONS, A., BARTELS, M. & DAVID, A. S. 2001. Recognizing one's own face. *Cognition*, 78, B1-B15.

KITA, Y., GUNJI, A., SAKIHARA, K., INAGAKI, M., KAGA, M., NAKAGAWA, E. & HOSOKAWA, T. 2010. Scanning strategies do not modulate face identification: Eye-tracking and near-infrared spectroscopy study. *PloS one*, 5, e11050.

KLIEMANN, D., DZIOBEK, I., HATRI, A., STEIMKE, R. & HEEKEREN, H. R. 2010. Atypical reflexive gaze patterns on emotional faces in autism spectrum disorders. *The Journal of Neuroscience*, 30, 12281-12287.

KLIN, A., JONES, W., SCHULTZ, R., VOLKMAR, F. & COHEN, D. 2002. Visual fixation patterns during viewing of naturalistic social situations as predictors of social competence in individuals with autism. *Archives of general psychiatry*, 59, 809-816.

LAUGHERY, K. R., ALEXANDER, J. F. & LANE, A. B. 1971. Recognition of human faces: Effects of target exposure time, target position, pose position, and type of photograph. *Journal of Applied Psychology*, 55, 477.

LOMBARDO, M. V., BARNES, J. L., WHEELWRIGHT, S. J. & BARON-COHEN, S. 2007. Self-referential cognition and empathy in autism. *PLoS One*, 2, e883.

LOMBARDO, M. V., CHAKRABARTI, B. & BARON-COHEN, S. 2009. What neuroimaging and perceptions of self-other similarity can tell us about the mechanism underlying mentalizing. *Behavioral and Brain Sciences*, 32, 152-153.

LOMBARDO, M. V., CHAKRABARTI, B., BULLMORE, E. T., SADEK, S. A., PASCO, G., WHEELWRIGHT, S. J., SUCKLING, J., BARON-COHEN, S. & CONSORTIUM, M. A. 2010. Atypical neural self-representation in autism. *Brain*, 133, 611-624.

LURIA, S. M. & STRAUSS, M. S. 2013. Comparison of eye movements over faces in photographic positives and negatives. *Perception*, 42, 1134-1143.

MA, Y. & HAN, S. 2010. Why we respond faster to the self than to others? An implicit positive association theory of self-advantage during implicit face recognition. *Journal of Experimental Psychology: Human Perception and Performance*, 36, 619.

NIELSEN, M. & DISSANAYAKE, C. 2004. Pretend play, mirror self-recognition and imitation: A longitudinal investigation through the second year. *Infant Behavior and Development*, 27, 342-365.

PANNESE, A. & HIRSCH, J. 2011. Self-face enhances processing of immediately preceding invisible faces. *Neuropsychologia*, 49, 564-573.

PELPHREY, K. A., SASSON, N. J., REZNICK, J. S., PAUL, G., GOLDMAN, B. D. & PIVEN, J. 2002. Visual scanning of faces in autism. *Journal of autism and developmental disorders*, 32, 249-261.

PIERCE, K., CONANT, D., HAZIN, R., STONER, R. & DESMOND, J. 2011. Preference for geometric patterns early in life as a risk factor for autism. *Archives of general psychiatry*, 68, 101-109.

PIERCE, K., MARINERO, S., HAZIN, R., MCKENNA, B., BARNES, C. C. & MALIGE, A. 2016. Eye tracking reveals abnormal visual preference for geometric images as an early biomarker of an autism spectrum disorder subtype associated with increased symptom severity. *Biological psychiatry*, 79, 657-666.

PLATEK, S. M., WATHNE, K., TIERNEY, N. G. & THOMSON, J. W. 2008. Neural correlates of self-face recognition: an effect-location meta-analysis. *Brain research*, 1232, 173-184.

PORCIELLO, G., MINIO-PALUELLO, I. & BUFALARI, I. 2016. Commentary: Attentional control and the self: The Self Attention Network (SAN). *Frontiers in psychology*, 7.

SCHYNS, P. G., BONNAR, L. & GOSSELIN, F. 2002. Show me the features! Understanding recognition from the use of visual information. *Psychological Science*, 13, 402-409.

SUGIURA, M., KAWASHIMA, R., NAKAMURA, K., OKADA, K., KATO, T., NAKAMURA, A., HATANO, K., ITOH, K., KOJIMA, S. & FUKUDA, H. 2000. Passive and active recognition of one's own face. *Neuroimage*, 11, 36-48.

SUI, J. & HUMPHREYS, G. W. 2013. The boundaries of self face perception: Response time distributions, perceptual categories, and decision weighting. *Visual Cognition*, 21, 415-445.

- SUI, J., ZHU, Y. & HAN, S. 2006. Self-face recognition in attended and unattended conditions: An event-related brain potential study. *Neuroreport*, 17, 423-427.
- TONG, F. & NAKAYAMA, K. 1999. Robust representations for faces: evidence from visual search. *Journal of Experimental Psychology: Human Perception and Performance*, 25, 1016.
- UDDIN, L. Q., DAVIES, M. S., SCOTT, A. A., ZAIDEL, E., BOOKHEIMER, S. Y., IACOBONI, M. & DAPRETTO, M. 2008. Neural basis of self and other representation in autism: an fMRI study of self-face recognition. *PloS one*, 3, e3526.
- UDDIN, L. Q., KAPLAN, J. T., MOLNAR-SZAKACS, I., ZAIDEL, E. & IACOBONI, M. 2005. Self-face recognition activates a frontoparietal “mirror” network in the right hemisphere: an event-related fMRI study. *Neuroimage*, 25, 926-935.
- VAN BELLE, G., RAMON, M., LEFÈVRE, P. & ROSSION, B. 2010. Fixation patterns during recognition of personally familiar and unfamiliar faces. *Frontiers in psychology*, 1, 1-8.
- WICKHAM, H. 2009. *ggplot2: elegant graphics for data analysis*, Springer Science & Business Media.
- WILLIAMS, D. 2010. Theory of own mind in autism Evidence of a specific deficit in self-awareness? *Autism*, 14, 474-494.
